# Supplementary material
Source: Research Square preprint supplement (doi:10.21203/rs.3.rs-9636776/v1)

(a) Study area

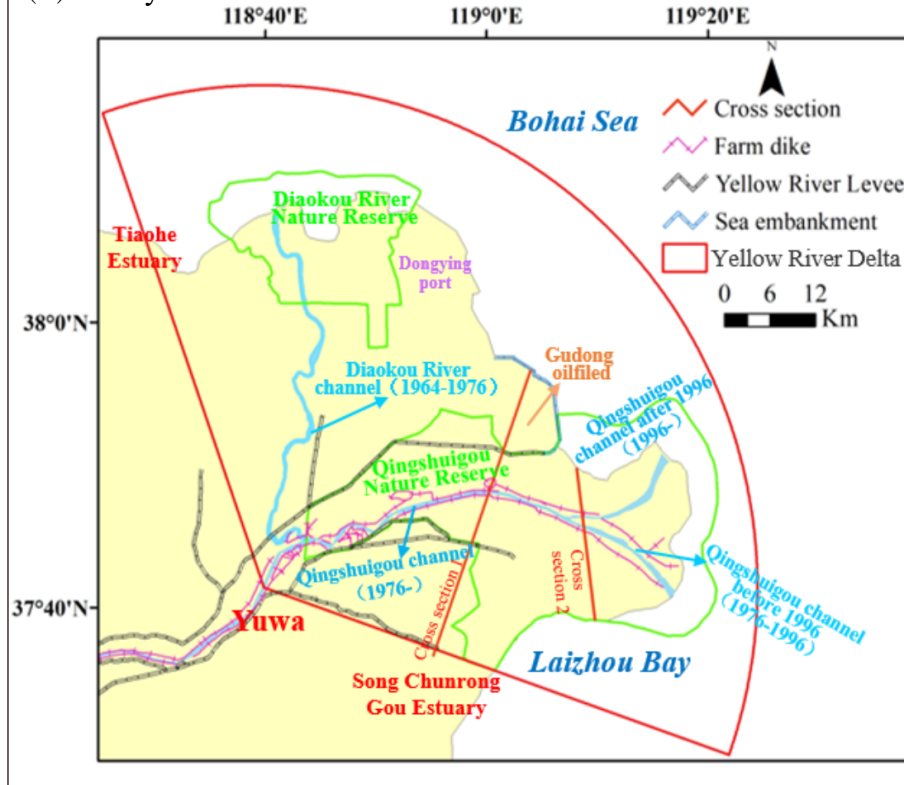

(b) Methodology framework

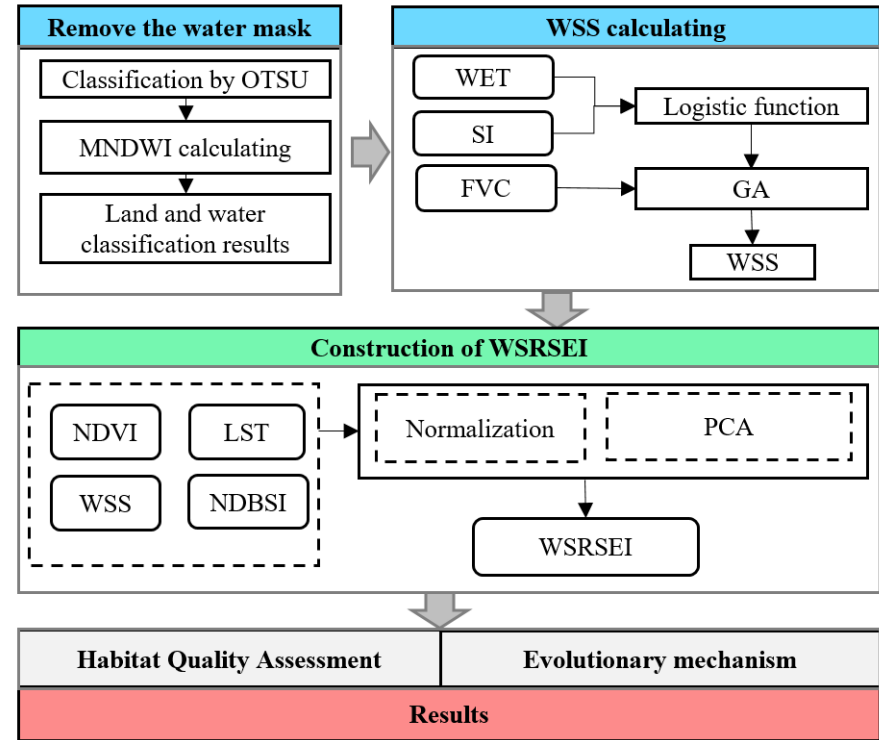

(c) Results

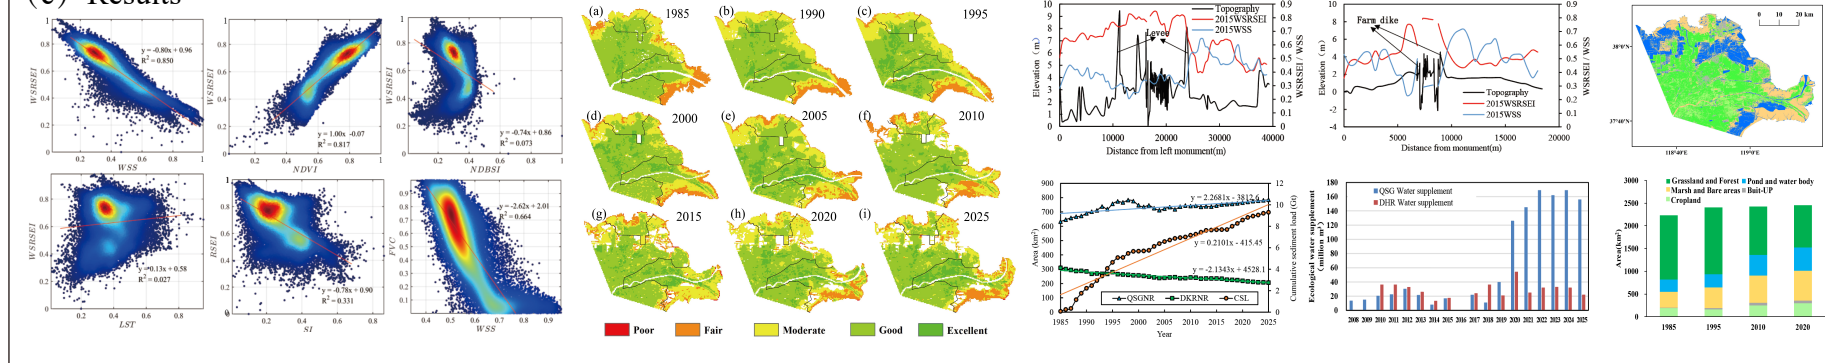

Supplement: Supplementary file 1 [file 04fca1431cfc1e7be5b3ab17.pdf]
